# Supplementary material for: Validation of Aspartylglucosaminidase Activity Assay for Human Serum Samples: Establishment of a Biomarker for Diagnostics and Clinical Studies
Source: MDPI journal article supplement (doi:10.3390/ijms24065722), 2023-03-16
Supplement: s1 [file s1]

# Supplementary Figure S1

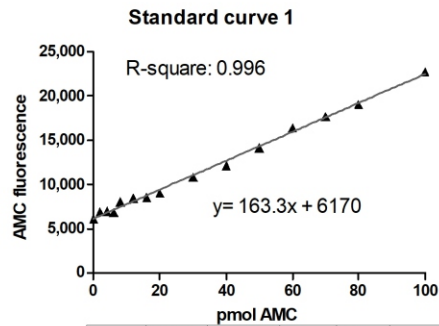

|     | pmol AMC<br>in serum<br>matrix | Fluorescence | pmol AMC | % of<br>expected<br>value | % deviation |
|-----|--------------------------------|--------------|----------|---------------------------|-------------|
| S1  | 0                              | 6,138        | -0.23    |                           |             |
| S2  | 2                              | 6,891        | 4.39     | 219.35                    | 100.36      |
| S3  | 4                              | 6,943        | 4.71     | 117.64                    | 17.64       |
| S4  | 6                              | 6,814        | 3.92     | 65.25                     | 14.75       |
| S5  | 8                              | 8,026        | 11.34    | 141.77                    | 41.77       |
| S6  | 12                             | 8,466        | 14.04    | 116.98                    | 16.98       |
| S7  | 16                             | 8,544        | 14.52    | 90.72                     | -9.28       |
| S8  | 20                             | 9,942        | 17.57    | 87.63                     | -12.37      |
| S9  | 30                             | 10,825       | 28.49    | 94.97                     | -5.03       |
| S10 | 40                             | 12,153       | 36.63    | 91.57                     | -8.43       |
| S11 | 50                             | 14,125       | 48.71    | 97.42                     | -2.58       |
| S12 | 60                             | 16,427       | 62.81    | 104.69                    | 4.69        |
| S13 | 70                             | 17,686       | 70.53    | 100.76                    | 0.76        |
| S14 | 80                             | 19,027       | 78.75    | 98.43                     | -1.57       |
| S15 | 100                            | 22,770       | 101.68   | 101.68                    | 1.68        |

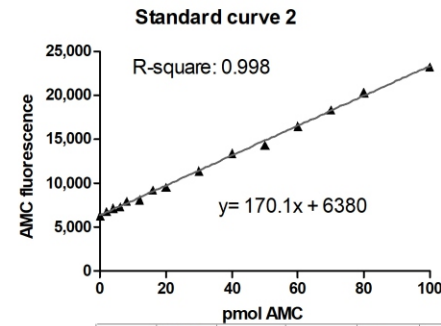

|     | pmol AMC<br>in serum<br>matrix | Fluorescence | pmol AMC | % of<br>expected<br>value | % deviation |
|-----|--------------------------------|--------------|----------|---------------------------|-------------|
| S1  | 0                              | 6,347        | -0.22    |                           |             |
| S2  | 2                              | 6,805        | 2.47     | 123.53                    | 23.53       |
| S3  | 4                              | 7,199        | 4.79     | 119.71                    | 19.71       |
| S4  | 6                              | 7,325        | 5.53     | 92.16                     | -7.84       |
| S5  | 8                              | 7,984        | 9.41     | 117.57                    | 17.57       |
| S6  | 12                             | 8,134        | 10.29    | 85.74                     | -14.26      |
| S7  | 16                             | 9,255        | 16.88    | 105.51                    | 5.51        |
| S8  | 20                             | 9,603        | 18.03    | 94.66                     | -5.35       |
| S9  | 30                             | 11,412       | 29.57    | 98.57                     | -1.43       |
| S10 | 40                             | 13,424       | 41.41    | 103.51                    | 3.51        |
| S11 | 50                             | 14,367       | 46.95    | 93.91                     | -6.09       |
| S12 | 60                             | 16,558       | 59.84    | 99.74                     | -0.26       |
| S13 | 70                             | 18,411       | 70.74    | 101.06                    | 1.06        |
| S14 | 80                             | 20,328       | 82.02    | 102.52                    | 2.52        |
| S15 | 100                            | 23,254       | 99.23    | 99.23                     | -0.77       |

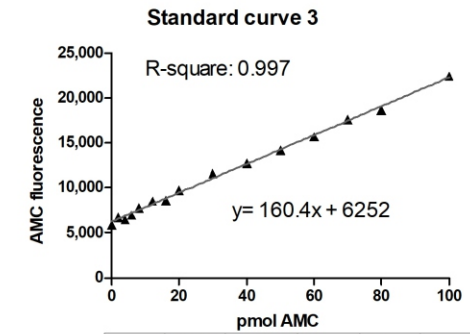

|     | pmol AMC<br>in serum<br>matrix | Fluorescence | pmol AMC | % of<br>expected<br>value | % deviation |
|-----|--------------------------------|--------------|----------|---------------------------|-------------|
| S1  | 0                              | 5,879        | -2.74    |                           |             |
| S2  | 2                              | 6,744        | 2.70     | 135.22                    | 35.22       |
| S3  | 4                              | 6,518        | 1.28     | 32.08                     | 17.08       |
| S4  | 6                              | 6,995        | 4.28     | 71.38                     | -28.62      |
| S5  | 8                              | 7,743        | 8.99     | 112.34                    | 12.34       |
| S6  | 12                             | 8,532        | 13.95    | 116.25                    | 16.25       |
| S7  | 16                             | 8,570        | 14.19    | 88.68                     | -11.32      |
| S8  | 20                             | 9,753        | 21.63    | 108.14                    | 8.14        |
| S9  | 30                             | 11,588       | 33.17    | 110.57                    | 10.57       |
| S10 | 40                             | 12,726       | 40.33    | 100.82                    | 0.82        |
| S11 | 50                             | 14,147       | 49.26    | 98.53                     | -1.47       |
| S12 | 60                             | 15,702       | 59.04    | 98.41                     | -1.59       |
| S13 | 70                             | 17,638       | 71.22    | 101.74                    | 1.74        |
| S14 | 80                             | 18,697       | 77.88    | 97.35                     | -2.65       |
| S15 | 100                            | 22,423       | 101.31   | 101.31                    | 1.31        |

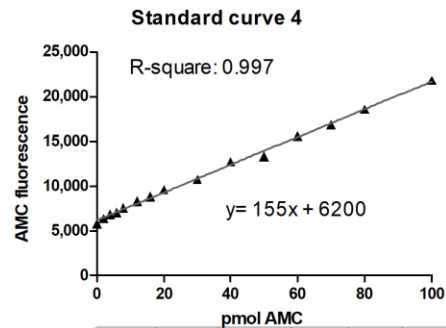

|     | pmol AMC<br>in serum<br>matrix | Fluorescence | pmol AMC | % of<br>expected<br>value | % deviation |
|-----|--------------------------------|--------------|----------|---------------------------|-------------|
| S1  | 0                              | 5,803        | -3.01    |                           |             |
| S2  | 2                              | 6,343        | 0.50     | 25.00                     | 75.00       |
| S3  | 4                              | 6,875        | 3.95     | 98.86                     | -1.14       |
| S4  | 6                              | 7,064        | 5.18     | 86.36                     | -13.64      |
| S5  | 8                              | 7,582        | 8.55     | 106.82                    | 6.82        |
| S6  | 12                             | 8,305        | 13.24    | 110.34                    | 10.34       |
| S7  | 16                             | 8,874        | 16.94    | 105.84                    | 5.84        |
| S8  | 20                             | 9,599        | 21.64    | 108.21                    | 8.21        |
| S9  | 30                             | 10,784       | 29.34    | 97.79                     | -2.21       |
| S10 | 40                             | 12,744       | 42.06    | 105.16                    | 5.16        |
| S11 | 50                             | 13,292       | 45.62    | 91.25                     | -8.75       |
| S12 | 60                             | 15,643       | 60.89    | 101.48                    | 1.48        |
| S13 | 70                             | 16,852       | 68.74    | 98.20                     | -1.80       |
| S14 | 80                             | 18,606       | 80.13    | 100.16                    | 0.16        |
| S15 | 100                            | 21,847       | 101.18   | 101.18                    | 1.18        |

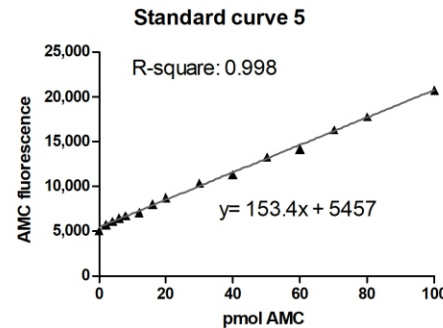

|     | pmol AMC<br>in serum<br>matrix | Fluorescence | pmol AMC | % of<br>expected<br>value | % deviation |
|-----|--------------------------------|--------------|----------|---------------------------|-------------|
| S1  | 0                              | 5,081        | -2.88    |                           |             |
| S2  | 2                              | 5,759        | 1.58     | 78.95                     | -21.05      |
| S3  | 4                              | 6,121        | 3.96     | 99.01                     | -0.99       |
| S4  | 6                              | 6,501        | 6.46     | 107.68                    | 7.68        |
| S5  | 8                              | 6,713        | 7.86     | 98.19                     | -1.81       |
| S6  | 12                             | 7,111        | 10.47    | 87.28                     | -12.72      |
| S7  | 16                             | 8,025        | 16.49    | 103.04                    | 3.04        |
| S8  | 20                             | 8,806        | 21.63    | 108.13                    | 8.13        |
| S9  | 30                             | 10,366       | 31.89    | 106.29                    | 6.29        |
| S10 | 40                             | 11,327       | 38.21    | 95.53                     | -4.47       |
| S11 | 50                             | 13,308       | 51.24    | 102.49                    | 2.49        |
| S12 | 60                             | 14,206       | 57.15    | 95.25                     | -4.75       |
| S13 | 70                             | 16,366       | 71.36    | 101.95                    | 1.95        |
| S14 | 80                             | 17,760       | 80.53    | 100.67                    | 0.67        |
| S15 | 100                            | 20,771       | 100.34   | 100.34                    | 0.34        |

**Supplementary Figure S1: Linearity and lower limit of quantification (LLOQ).** AMC-standards were pipetted as outlined in Table 1. Raw AMC fluorescence (in artificial units) was related to the corresponding AMC amount in pmol. The slope, y-intercept and, R-square were calculated by linear regression analysis. The data for the independent experiments used for Figure 1 are shown. Concentrations of the calibration standards were back-calculated. Green numbers indicate back-calculation of the standards within the requested limits ( $\pm 15\%$  of the nominal value, for LLOQ  $\pm 20\%$ ), yellow colors refer to back calculations close, but outside the requested range, and red colors indicate values where back-calculation was inaccurate. LLOQ of each standard curve was determined to range between 2 and 6 pmol (= uppermost green AMC standard) and was averaged to obtain the mean LLOQ (i.e. 4.8 pmol AMC).

## Supplementary Figure S2

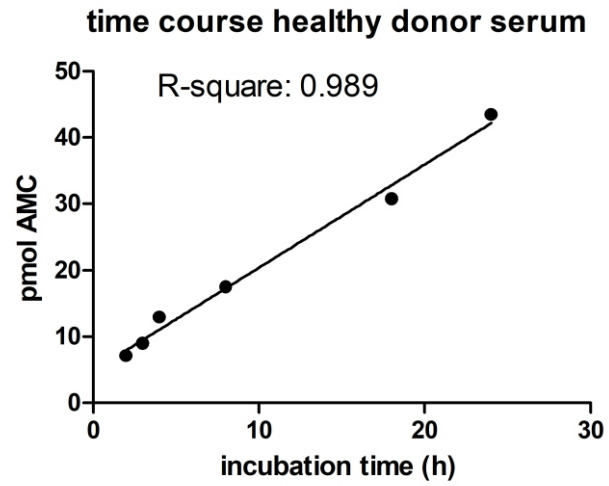

**Supplementary Figure S2: Linearity of the activity assay from 1 h to 24 h.** AGA activity was measured using 10  $\mu$ L of serum from a healthy donor. The graph shows the amount of liberated AMC (pmol) as a function of time.

**Supplementary Table S1:** Coefficients of variation (CV) of the individual measurements of within-run and between-run precision.

| Within-run precision<br>(Data from Figure 3) |        | Between-run precision<br>healthy donors<br>(Data from Figure 4A) |        | Between-run precision<br>Patients<br>(Data from Figure 4B) |        |
|----------------------------------------------|--------|------------------------------------------------------------------|--------|------------------------------------------------------------|--------|
| Sample ID                                    | CV (%) | Sample ID                                                        | CV (%) | Sample ID                                                  | CV (%) |
| Healthy donor 2                              | 3.73   | Healthy donor 1                                                  | 8.21   | Patient 1                                                  | 9.81   |
| Healthy donor 3                              | 3.22   | Healthy donor 2                                                  | 6.98   | Patient 2                                                  | 48.94  |
| Healthy donor 5                              | 1.06   | Healthy donor 3                                                  | 9.25   | Patient 3                                                  | 17.63  |
| Healthy donor 6                              | 3.57   | Healthy donor 4                                                  | 4.93   | Patient 4                                                  | 105.82 |
| Healthy donor 8                              | 1.81   | Healthy donor 5                                                  | 6.54   | Patient 5                                                  | 52.14  |
| Healthy donor 10                             | 4.45   | Healthy donor 6                                                  | 10.09  | Patient 6                                                  | 26.19  |
| Patient 1                                    | 6.83   | Healthy donor 8                                                  | 12.76  | Patient 7                                                  | 22.31  |
| Patient 7                                    | 3.68   | Healthy donor 10                                                 | 7.23   | Patient 8                                                  | 65.24  |
| Patient 8                                    | 5.22   |                                                                  |        | Patient 9                                                  | 128.58 |
| Patient 14                                   | 5.98   |                                                                  |        | Patient 10                                                 | 19.74  |
| Patient 18                                   | 5.16   |                                                                  |        | Patient 11                                                 | 23.66  |
| Patient 19                                   | 14.78  |                                                                  |        | Patient 12                                                 | 86.78  |
|                                              |        |                                                                  |        | Patient 13                                                 | 32.81  |
|                                              |        |                                                                  |        | Patient 14                                                 | 66.66  |
|                                              |        |                                                                  |        | Patient 15                                                 | 62.11  |
|                                              |        |                                                                  |        | Patient 16                                                 | 43.14  |
|                                              |        |                                                                  |        | Patient 17                                                 | 65.04  |
|                                              |        |                                                                  |        | Patient 18                                                 | 37.23  |
|                                              |        |                                                                  |        | Patient 19                                                 | 47.03  |
|                                              |        |                                                                  |        | Patient 20                                                 | 41.37  |
